# Supplementary material for: Local read haplotagging enables accurate long-read small variant calling
Source: PubMed Central journal article supplement (PMC11246426; doi:10.1038/s41467-024-50079-5), 2024-07-13
Supplement: 41467_2024_50079_MOESM1_ESM.pdf [file 41467_2024_50079_MOESM1_ESM.pdf]

---

# LOCAL READ HAPLOTAGGING ENABLES ACCURATE LONG-READ SMALL VARIANT CALLING

---

## Supplementary Notes

### Commands used for analysis

#### pbmm2

We used pbmm2 to align PacBio reads to the reference. Following is the command used:

```
docker run -it -v /data:/data \  
quay.io/biocontainers/pbmm2:1.10.0--h9ee0642_0 \  
pbmm2 align --preset HIFI --sort \  
/data/Reference.fasta \  
/data/inputs.fofn \  
/data/output.pbmm2.bam
```

#### minimap2

We used minimap2 to align ONT reads to the reference. Following is the command used:

```
minimap2 -k 17 -ax map-ont \  
-t 95 REF.fasta INPUT.fastq.gz | samtools sort -@4 -m 4G > OUTPUT.bam
```

#### WhastHap

We used WhastHap to phase and haplotag PacBio and ONT data. Following is the command used:

```
whatshap phase --ignore-read-groups \  
-o OUTPUT.phased.vcf -r REF.fasta \  
INPUT.unphased.vcf INPUT.unhaplotagged.bam
```

```
whatshap haplotag \  
--output OUTPUT.haplotagged.bam \  
--reference /data/REF.fasta --ignore-read-groups \  
OUTPUT.phased.vcf INPUT.unhaplotagged.bam
```

#### DeepVariant

We used DeepVariant variant caller to generate variant calls for PacBio and ONT data. Following is the command used:

```
docker run -v /data:/data \  
google/deepvariant:1.5.0 \  
/opt/deepvariant/bin/run_deepvariant \  
--model_type=PACBIO \  
--ref=/data/REF.fasta \  
--reads=/data/INPUT.bam \  
--output_vcf=/data/OUTPUT.vcf \  
--output_gvcf=/data/OUTPUT.gvcf \  
--num_shards=95 \  
--logging_dir=/data/log_dir
```

We used `google/deepvariant:1.5.0` for analysis that includes approximate haplotagging and `google/deepvariant:1.2.0` for baseline comparison with no haplotagging and haplotagging with WhatsHap analysis. We used `-model_type=PACBIO` for variant calling on PacBio data and `-model_type=ONT_R104` for variant calling with ONT data.

### Clair3

We used Clair3 variant caller to generate variant calls for ONT data. Following is the command used:

```
sudo docker run -it -v /data:/data \
hkubal/clair3:latest \
/opt/bin/run_clair3.sh \
--bam_fn=/data/INPUT.bam \
--ref_fn=/data/REF.fasta \
--threads=95 \
--platform="ont" \
--model_path=/data/model_path/ \
--output=/data/output_dir/
```

We used `r1041_e82_400bps_sup_g615` model for variant calling R10.4 chemistry data with simplex and duplex types.

### PEPPER

We used PEPPER variant caller to generate variant calls for ONT data. Following is the command used:

```
time docker run -it -v /data:/data \
kishwars/pepper_deepvariant:r0.8 \
run_pepper_margin_deepvariant call_variant \
-b /data/INPUT.bam \
-f /data/REF.fasta \
-o /data/output_dir/ \
-p output_prefix \
-t 95 \
--ont_r9_guppy5_sup
```

### Hap.py

We used `hap.py` version `v0.3.12` to compare variant calls against GIAB truth set. Following is the command used:

```
docker run -it -v /data:/data/ \
jmcDani20/hap.py:v0.3.12 /opt/hap.py/bin/hap.py \
/data/Benchmark.vcf.gz \
/data/INPUT.vcf.gz \
-f /data/Benchmark.bed \
-r /data/reference.fna \
-o /data/output/prefix \
--pass-only \
--engine=vcfeval \
--threads=95
```

### BEST

We used best software <https://github.com/google/best> to assess the quality of the reads against reference genome.

```
./best \
INPUT.bam REF.fasta \
OUTPUT_DIR/OUTPUT_PREFIX \
--intervals-bed INTERVAL.bed -t 96
```

Supplementary Figures

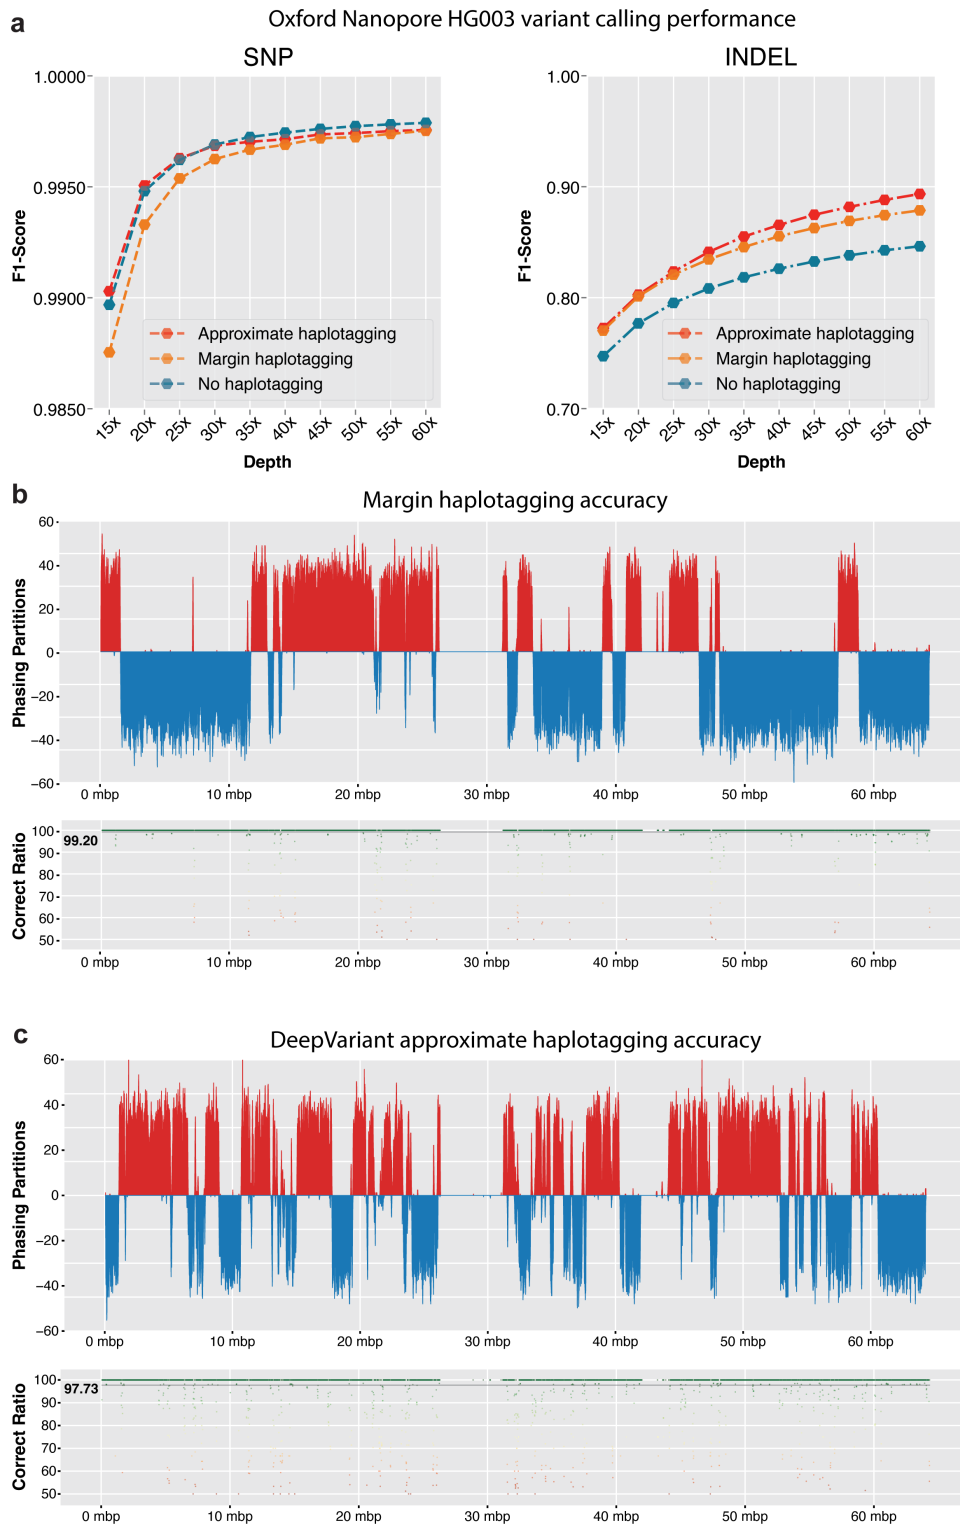

Supplementary Figure 1: Effectiveness of local haplotagging approximation for variant calling with Oxford Nanopore data. **a.** Variant calling accuracy improvement with approximate haplotagging. **b.** Haplotagging accuracy of Margin. **c.** Haplotagging accuracy with the local approximate haplotagging method.

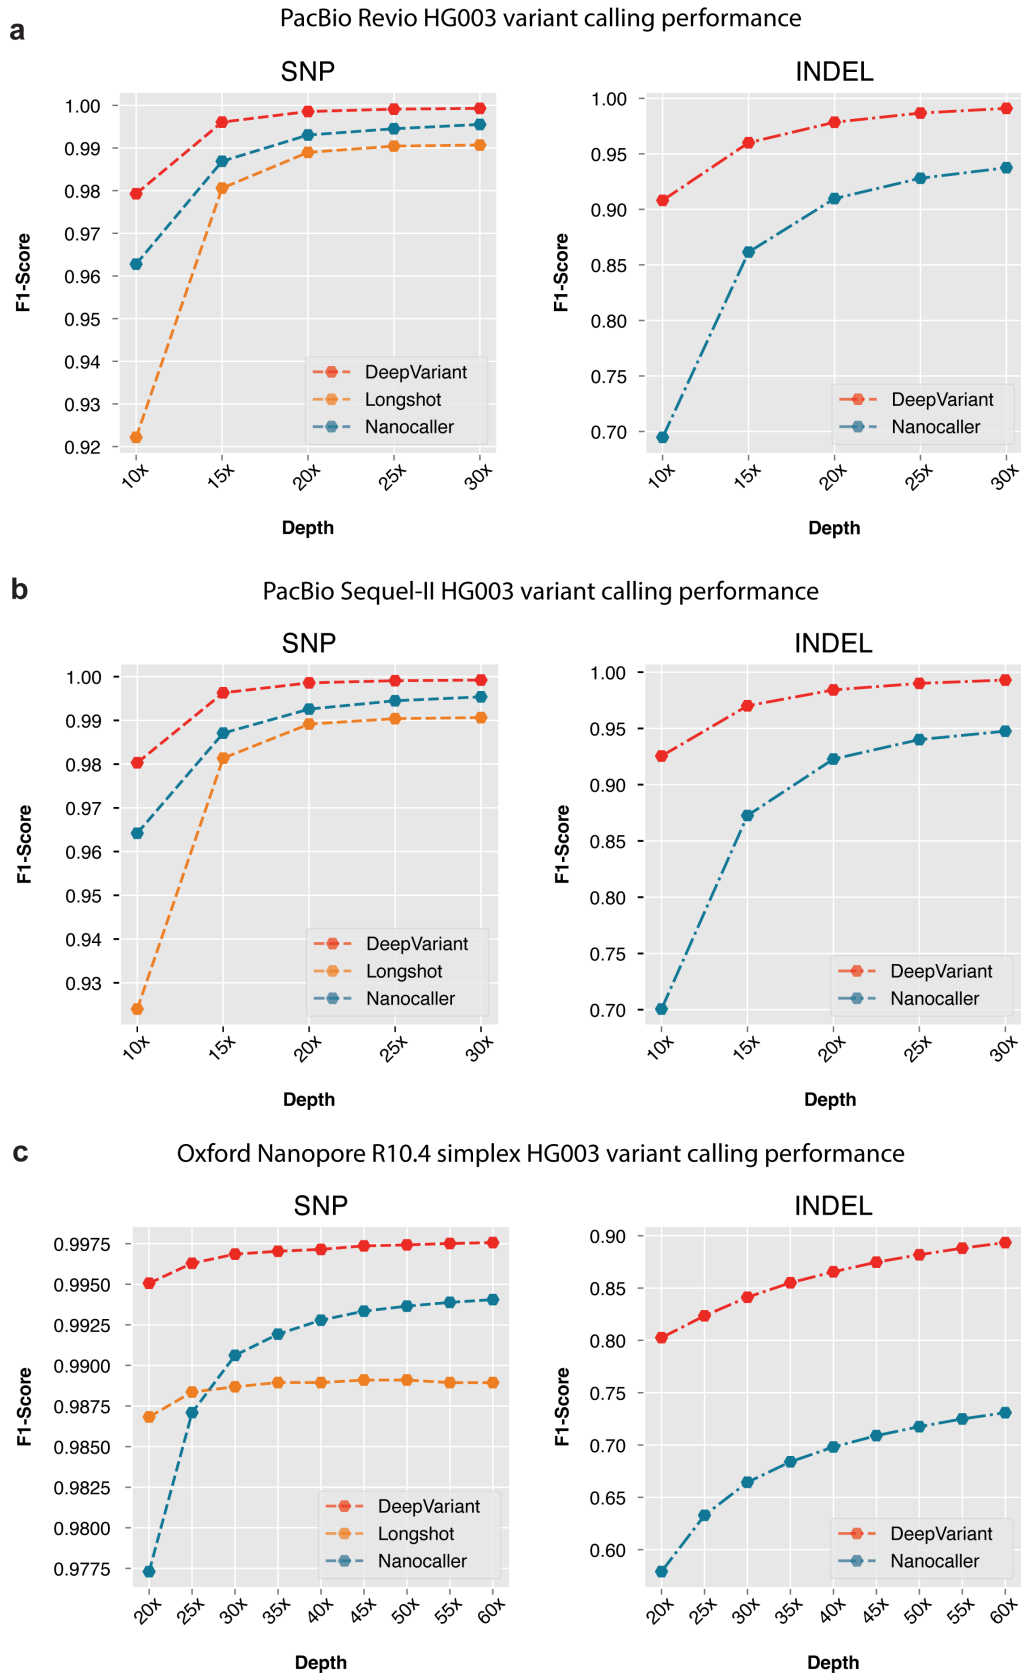

Supplementary Figure 2: Variant calling accuracy comparison between different variant callers DeepVariant, LongShot and NanoCaller. **a.** PacBio Revio variant calling performance comparison. **b.** PacBio Sequel-II variant calling performance comparison. **c.** ONT R10.4 simplex variant calling performance comparison.

## Supplementary Tables

| Coverage | Mode                     | Type  | Total   | TP      | FN    | FP    | Recall   | Precision | F1-Score |
|----------|--------------------------|-------|---------|---------|-------|-------|----------|-----------|----------|
| 15x      | No haplotag information  | INDEL | 504501  | 475924  | 28577 | 19110 | 0.943356 | 0.962773  | 0.952966 |
|          |                          | SNP   | 3327495 | 3306618 | 20877 | 5629  | 0.993726 | 0.998302  | 0.996009 |
|          | WhatsHap haplotagging    | INDEL | 504501  | 487406  | 17095 | 12968 | 0.966115 | 0.975029  | 0.970551 |
|          |                          | SNP   | 3327495 | 3306574 | 20921 | 4750  | 0.993713 | 0.998567  | 0.996134 |
|          | Approximate haplotagging | INDEL | 504501  | 486509  | 17992 | 12463 | 0.964337 | 0.975933  | 0.970101 |
|          |                          | SNP   | 3327495 | 3307835 | 19660 | 4831  | 0.994092 | 0.998543  | 0.996312 |
| 20x      | No haplotag information  | INDEL | 504501  | 488680  | 15821 | 12121 | 0.96864  | 0.976708  | 0.972658 |
|          |                          | SNP   | 3327495 | 3319839 | 7656  | 3549  | 0.997699 | 0.998933  | 0.998316 |
|          | WhatsHap haplotagging    | INDEL | 504501  | 496068  | 8433  | 7620  | 0.983284 | 0.985451  | 0.984366 |
|          |                          | SNP   | 3327495 | 3319757 | 7738  | 2778  | 0.997675 | 0.999165  | 0.998419 |
|          | Approximate haplotagging | INDEL | 504501  | 495573  | 8928  | 7237  | 0.982303 | 0.986157  | 0.984227 |
|          |                          | SNP   | 3327495 | 3320920 | 6575  | 2814  | 0.998024 | 0.999154  | 0.998589 |
| 25x      | No haplotag information  | INDEL | 504501  | 494504  | 9997  | 8298  | 0.980184 | 0.984133  | 0.982155 |
|          |                          | SNP   | 3327495 | 3322610 | 4885  | 2911  | 0.998532 | 0.999125  | 0.998829 |
|          | WhatsHap haplotagging    | INDEL | 504501  | 499415  | 5086  | 4981  | 0.989919 | 0.99051   | 0.990214 |
|          |                          | SNP   | 3327495 | 3322526 | 4969  | 2245  | 0.998507 | 0.999325  | 0.998916 |
|          | Approximate haplotagging | INDEL | 504501  | 499064  | 5437  | 4789  | 0.989223 | 0.990867  | 0.990044 |
|          |                          | SNP   | 3327495 | 3323614 | 3881  | 2231  | 0.998834 | 0.99933   | 0.999082 |
| 30x      | No haplotag information  | INDEL | 504501  | 497618  | 6883  | 5985  | 0.986357 | 0.988581  | 0.987468 |
|          |                          | SNP   | 3327495 | 3323336 | 4159  | 2521  | 0.99875  | 0.999243  | 0.998996 |
|          | WhatsHap haplotagging    | INDEL | 504501  | 501098  | 3403  | 3408  | 0.993255 | 0.993513  | 0.993384 |
|          |                          | SNP   | 3327495 | 3323326 | 4169  | 1889  | 0.998747 | 0.999432  | 0.99909  |
|          | Approximate haplotagging | INDEL | 504501  | 500790  | 3711  | 3481  | 0.992644 | 0.99337   | 0.993007 |
|          |                          | SNP   | 3327495 | 3324370 | 3125  | 1989  | 0.999061 | 0.999403  | 0.999232 |
| 35x      | No haplotag information  | INDEL | 504501  | 499364  | 5137  | 4469  | 0.989818 | 0.991481  | 0.990649 |
|          |                          | SNP   | 3327495 | 3323559 | 3936  | 2257  | 0.998817 | 0.999322  | 0.999069 |
|          | WhatsHap haplotagging    | INDEL | 504501  | 501845  | 2656  | 2735  | 0.994735 | 0.994795  | 0.994765 |
|          |                          | SNP   | 3327495 | 3323619 | 3876  | 1830  | 0.998835 | 0.99945   | 0.999143 |
|          | Approximate haplotagging | INDEL | 504501  | 501629  | 2872  | 2771  | 0.994307 | 0.994725  | 0.994516 |
|          |                          | SNP   | 3327495 | 3324633 | 2862  | 1852  | 0.99914  | 0.999444  | 0.999292 |

Supplementary Table 1: PacBio-HiFi variant calling performance of DeepVariant with no haplotagging, whatshap haplotagging and approximate haplotagging.

| Coverage | Platform  | Type  | Total   | TP      | FN     | FP     | Recall   | Precision | F1_Score |
|----------|-----------|-------|---------|---------|--------|--------|----------|-----------|----------|
| 5x       | Sequel II | INDEL | 504501  | 325065  | 179436 | 48949  | 0.64433  | 0.87124   | 0.740798 |
|          |           | SNP   | 3327495 | 2568343 | 759152 | 119685 | 0.771855 | 0.955498  | 0.853914 |
|          | Revio     | INDEL | 504501  | 314909  | 189592 | 57900  | 0.624199 | 0.847147  | 0.718782 |
|          |           | SNP   | 3327495 | 2565892 | 761603 | 119109 | 0.771118 | 0.955662  | 0.853529 |
| 10x      | Sequel II | INDEL | 504501  | 454954  | 49547  | 24525  | 0.90179  | 0.950427  | 0.92547  |
|          |           | SNP   | 3327495 | 3216400 | 111095 | 18094  | 0.966613 | 0.99441   | 0.980315 |
|          | Revio     | INDEL | 504501  | 445946  | 58555  | 32760  | 0.883935 | 0.933607  | 0.908092 |
|          |           | SNP   | 3327495 | 3211531 | 115964 | 19959  | 0.96515  | 0.993828  | 0.979279 |
| 15x      | Sequel II | INDEL | 504501  | 486509  | 17992  | 12463  | 0.964337 | 0.975933  | 0.970101 |
|          |           | SNP   | 3327495 | 3307835 | 19660  | 4831   | 0.994092 | 0.998543  | 0.996312 |
|          | Revio     | INDEL | 504501  | 480852  | 23649  | 17008  | 0.953124 | 0.967055  | 0.960039 |
|          |           | SNP   | 3327495 | 3306551 | 20944  | 5121   | 0.993706 | 0.998455  | 0.996075 |
| 20x      | Sequel II | INDEL | 504501  | 495573  | 8928   | 7237   | 0.982303 | 0.986157  | 0.984227 |
|          |           | SNP   | 3327495 | 3320920 | 6575   | 2814   | 0.998024 | 0.999154  | 0.998589 |
|          | Revio     | INDEL | 504501  | 492207  | 12294  | 9771   | 0.975631 | 0.981271  | 0.978443 |
|          |           | SNP   | 3327495 | 3320738 | 6757   | 2801   | 0.997969 | 0.999158  | 0.998563 |
| 25x      | Sequel II | INDEL | 504501  | 499064  | 5437   | 4789   | 0.989223 | 0.990867  | 0.990044 |
|          |           | SNP   | 3327495 | 3323614 | 3881   | 2231   | 0.998834 | 0.99933   | 0.999082 |
|          | Revio     | INDEL | 504501  | 497096  | 7405   | 6223   | 0.985322 | 0.988116  | 0.986717 |
|          |           | SNP   | 3327495 | 3323686 | 3809   | 2059   | 0.998855 | 0.999381  | 0.999118 |
| 30x      | Sequel II | INDEL | 504501  | 500790  | 3711   | 3481   | 0.992644 | 0.99337   | 0.993007 |
|          |           | SNP   | 3327495 | 3324370 | 3125   | 1989   | 0.999061 | 0.999403  | 0.999232 |
|          | Revio     | INDEL | 504501  | 499552  | 4949   | 4354   | 0.99019  | 0.991699  | 0.990944 |
|          |           | SNP   | 3327495 | 3324580 | 2915   | 1727   | 0.999124 | 0.999481  | 0.999303 |

Supplementary Table 2: PacBio-HiFi variant calling performance comparison of DeepVariant on Sequel-II and Revio platforms at different coverages.

| Cov. | Caller      | Type  | Total   | TP      | FN     | FP     | Recall   | Precision | F1       |
|------|-------------|-------|---------|---------|--------|--------|----------|-----------|----------|
| 10x  | DeepVariant | INDEL | 504501  | 316320  | 188181 | 69165  | 0.626996 | 0.824024  | 0.712133 |
|      |             | SNP   | 3327495 | 3152000 | 175495 | 56238  | 0.947259 | 0.982476  | 0.964546 |
|      | PEPPER      | INDEL | 504501  | 298224  | 206277 | 48609  | 0.591127 | 0.862071  | 0.70134  |
|      |             | SNP   | 3327495 | 3140268 | 187227 | 62700  | 0.943733 | 0.980428  | 0.961731 |
|      | Clair3      | INDEL | 504501  | 334539  | 169962 | 132794 | 0.663109 | 0.719643  | 0.69022  |
|      |             | SNP   | 3327495 | 3256496 | 70999  | 225280 | 0.978663 | 0.935315  | 0.956498 |
| 15x  | DeepVariant | INDEL | 504501  | 359668  | 144833 | 69022  | 0.712918 | 0.843013  | 0.772527 |
|      |             | SNP   | 3327495 | 3288775 | 38720  | 25744  | 0.988364 | 0.992235  | 0.990296 |
|      | PEPPER      | INDEL | 504501  | 350018  | 154483 | 55450  | 0.69379  | 0.865762  | 0.770294 |
|      |             | SNP   | 3327495 | 3283461 | 44034  | 38814  | 0.986767 | 0.98832   | 0.987543 |
|      | Clair3      | INDEL | 504501  | 365993  | 138508 | 86500  | 0.725455 | 0.812119  | 0.766345 |
|      |             | SNP   | 3327495 | 3305838 | 21657  | 58142  | 0.993492 | 0.982723  | 0.988078 |
| 20x  | DeepVariant | INDEL | 504501  | 380627  | 123874 | 65512  | 0.754462 | 0.857262  | 0.802584 |
|      |             | SNP   | 3327495 | 3312923 | 14572  | 18308  | 0.995621 | 0.994506  | 0.995063 |
|      | PEPPER      | INDEL | 504501  | 374497  | 130004 | 57136  | 0.742312 | 0.870199  | 0.801184 |
|      |             | SNP   | 3327495 | 3311580 | 15915  | 28778  | 0.995217 | 0.991387  | 0.993298 |
|      | Clair3      | INDEL | 504501  | 382081  | 122420 | 66293  | 0.757344 | 0.854966  | 0.8032   |
|      |             | SNP   | 3327495 | 3316247 | 11248  | 31521  | 0.99662  | 0.990588  | 0.993595 |
| 25x  | DeepVariant | INDEL | 504501  | 395117  | 109384 | 62184  | 0.783184 | 0.868111  | 0.823463 |
|      |             | SNP   | 3327495 | 3318240 | 9255   | 15473  | 0.997219 | 0.99536   | 0.996289 |
|      | PEPPER      | INDEL | 504501  | 389165  | 115336 | 55945  | 0.771386 | 0.876844  | 0.820741 |
|      |             | SNP   | 3327495 | 3318979 | 8516   | 22297  | 0.997441 | 0.993329  | 0.99538  |
|      | Clair3      | INDEL | 504501  | 393418  | 111083 | 56896  | 0.779816 | 0.876246  | 0.825223 |
|      |             | SNP   | 3327495 | 3319621 | 7874   | 24503  | 0.997634 | 0.992676  | 0.995149 |
| 30x  | DeepVariant | INDEL | 504501  | 407454  | 97047  | 58882  | 0.807638 | 0.877687  | 0.841207 |
|      |             | SNP   | 3327495 | 3320004 | 7491   | 13466  | 0.997749 | 0.995962  | 0.996854 |
|      | PEPPER      | INDEL | 504501  | 399453  | 105048 | 54650  | 0.791778 | 0.882125  | 0.834514 |
|      |             | SNP   | 3327495 | 3321557 | 5938   | 19046  | 0.998215 | 0.9943    | 0.996254 |
|      | Clair3      | INDEL | 504501  | 401819  | 102682 | 51547  | 0.796468 | 0.88874   | 0.840078 |
|      |             | SNP   | 3327495 | 3320762 | 6733   | 21388  | 0.997977 | 0.993603  | 0.995785 |
| 35x  | DeepVariant | INDEL | 504501  | 416788  | 87713  | 55671  | 0.826139 | 0.885965  | 0.855007 |
|      |             | SNP   | 3327495 | 3320458 | 7037   | 12739  | 0.997885 | 0.99618   | 0.997032 |
|      | PEPPER      | INDEL | 504501  | 407403  | 97098  | 52990  | 0.807537 | 0.88734   | 0.845559 |
|      |             | SNP   | 3327495 | 3322620 | 4875   | 17284  | 0.998535 | 0.994826  | 0.996677 |
|      | Clair3      | INDEL | 504501  | 408248  | 96253  | 47749  | 0.809211 | 0.897618  | 0.851125 |
|      |             | SNP   | 3327495 | 3321463 | 6032   | 18754  | 0.998187 | 0.994388  | 0.996284 |

Supplementary Table 3: Oxford Nanopore Technologies variant calling performance comparison between DeepVariant, PEPPER and Clair3 at different coverages between 10x to 35x.

| Cov. | Caller      | Type  | Total   | TP      | FN    | FP    | Recall   | Precision | F1       |
|------|-------------|-------|---------|---------|-------|-------|----------|-----------|----------|
| 40x  | DeepVariant | INDEL | 504501  | 423764  | 80737 | 52909 | 0.839967 | 0.892638  | 0.865502 |
|      |             | SNP   | 3327495 | 3320622 | 6873  | 12133 | 0.997934 | 0.996361  | 0.997147 |
|      | PEPPER      | INDEL | 504501  | 414119  | 90382 | 50919 | 0.820849 | 0.892862  | 0.855342 |
|      |             | SNP   | 3327495 | 3323047 | 4448  | 16226 | 0.998663 | 0.995142  | 0.9969   |
|      | Clair3      | INDEL | 504501  | 413098  | 91403 | 44926 | 0.818825 | 0.90416   | 0.859379 |
|      |             | SNP   | 3327495 | 3321714 | 5781  | 16813 | 0.998263 | 0.994966  | 0.996612 |
| 45x  | DeepVariant | INDEL | 504501  | 429614  | 74887 | 50066 | 0.851562 | 0.899097  | 0.874684 |
|      |             | SNP   | 3327495 | 3320801 | 6694  | 10871 | 0.997988 | 0.996738  | 0.997363 |
|      | PEPPER      | INDEL | 504501  | 419218  | 85283 | 49312 | 0.830956 | 0.897071  | 0.862748 |
|      |             | SNP   | 3327495 | 3323348 | 4147  | 14599 | 0.998754 | 0.995628  | 0.997188 |
|      | Clair3      | INDEL | 504501  | 416625  | 87876 | 42430 | 0.825816 | 0.90973   | 0.865744 |
|      |             | SNP   | 3327495 | 3322293 | 5202  | 12983 | 0.998437 | 0.996109  | 0.997272 |
| 50x  | DeepVariant | INDEL | 504501  | 434092  | 70409 | 47794 | 0.860438 | 0.904207  | 0.88178  |
|      |             | SNP   | 3327495 | 3320812 | 6683  | 10474 | 0.997992 | 0.996857  | 0.997424 |
|      | PEPPER      | INDEL | 504501  | 423610  | 80891 | 47830 | 0.839661 | 0.90081   | 0.869161 |
|      |             | SNP   | 3327495 | 3323553 | 3942  | 14460 | 0.998815 | 0.995669  | 0.99724  |
|      | Clair3      | INDEL | 504501  | 419323  | 85178 | 40845 | 0.831164 | 0.913352  | 0.870322 |
|      |             | SNP   | 3327495 | 3322322 | 5173  | 12292 | 0.998445 | 0.996315  | 0.997379 |
| 55x  | DeepVariant | INDEL | 504501  | 438117  | 66384 | 45778 | 0.868417 | 0.908663  | 0.888084 |
|      |             | SNP   | 3327495 | 3320863 | 6632  | 9938  | 0.998007 | 0.997017  | 0.997512 |
|      | PEPPER      | INDEL | 504501  | 427106  | 77395 | 46546 | 0.846591 | 0.903942  | 0.874327 |
|      |             | SNP   | 3327495 | 3323552 | 3943  | 13473 | 0.998815 | 0.995964  | 0.997387 |
|      | Clair3      | INDEL | 504501  | 421823  | 82678 | 39301 | 0.836119 | 0.91683   | 0.874616 |
|      |             | SNP   | 3327495 | 3322252 | 5243  | 11429 | 0.998424 | 0.996573  | 0.997498 |
| 60x  | DeepVariant | INDEL | 504501  | 441442  | 63059 | 43947 | 0.875007 | 0.912632  | 0.893423 |
|      |             | SNP   | 3327495 | 3320861 | 6634  | 9573  | 0.998006 | 0.997127  | 0.997566 |
|      | PEPPER      | INDEL | 504501  | 430032  | 74469 | 45458 | 0.852391 | 0.906561  | 0.878642 |
|      |             | SNP   | 3327495 | 3323667 | 3828  | 12639 | 0.99885  | 0.996213  | 0.997529 |
|      | Clair3      | INDEL | 504501  | 423735  | 80766 | 37991 | 0.839909 | 0.91973   | 0.878009 |
|      |             | SNP   | 3327495 | 3322068 | 5427  | 9920  | 0.998369 | 0.997024  | 0.997696 |
| 65x  | DeepVariant | INDEL | 504501  | 444208  | 60293 | 42612 | 0.88049  | 0.915553  | 0.897679 |
|      |             | SNP   | 3327495 | 3320812 | 6683  | 9294  | 0.997992 | 0.99721   | 0.997601 |
|      | PEPPER      | INDEL | 504501  | 432767  | 71734 | 43959 | 0.857812 | 0.909908  | 0.883093 |
|      |             | SNP   | 3327495 | 3323726 | 3769  | 11211 | 0.998867 | 0.996639  | 0.997752 |
|      | Clair3      | INDEL | 504501  | 424915  | 79586 | 37232 | 0.842248 | 0.921413  | 0.880054 |
|      |             | SNP   | 3327495 | 3321510 | 5985  | 9341  | 0.998201 | 0.997197  | 0.997699 |

Supplementary Table 4: Oxford Nanopore Technologies variant calling performance comparison between DeepVariant, PEPPER and Clair3 at different coverages between 40x to 65x.



| Cov. | Platform    | Type   | Total   | TP      | FN     | FP     | Recall   | Precision | F1       |
|------|-------------|--------|---------|---------|--------|--------|----------|-----------|----------|
| 10x  | R10.4.1     | INDEL  | 504501  | 316320  | 188181 | 69165  | 0.626996 | 0.824024  | 0.712133 |
|      | DeepVariant | SNP    | 3327495 | 3152000 | 175495 | 56238  | 0.947259 | 0.982476  | 0.964546 |
|      |             | R9.4.1 | INDEL   | 504501  | 209342 | 295159 | 40606    | 0.414949  | 0.839909 |
|      | PEPPER      | SNP    | 3327495 | 2984659 | 342836 | 57620  | 0.896969 | 0.981062  | 0.937133 |
| 15x  | R10.4.1     | INDEL  | 504501  | 359668  | 144833 | 69022  | 0.712918 | 0.843013  | 0.772527 |
|      | DeepVariant | SNP    | 3327495 | 3288775 | 38720  | 25744  | 0.988364 | 0.992235  | 0.990296 |
|      |             | R9.4.1 | INDEL   | 504501  | 276696 | 227805 | 50025    | 0.548455  | 0.849811 |
|      | PEPPER      | SNP    | 3327495 | 3230875 | 96620  | 18904  | 0.970963 | 0.994184  | 0.982436 |
| 20x  | R10.4.1     | INDEL  | 504501  | 380627  | 123874 | 65512  | 0.754462 | 0.857262  | 0.802584 |
|      | DeepVariant | SNP    | 3327495 | 3312923 | 14572  | 18308  | 0.995621 | 0.994506  | 0.995063 |
|      |             | R9.4.1 | INDEL   | 504501  | 311062 | 193439 | 53260    | 0.616574  | 0.856908 |
|      | PEPPER      | SNP    | 3327495 | 3286111 | 41384  | 11946  | 0.987563 | 0.996379  | 0.991951 |
| 25x  | R10.4.1     | INDEL  | 504501  | 395117  | 109384 | 62184  | 0.783184 | 0.868111  | 0.823463 |
|      | DeepVariant | SNP    | 3327495 | 3318240 | 9255   | 15473  | 0.997219 | 0.99536   | 0.996289 |
|      |             | R9.4.1 | INDEL   | 504501  | 332679 | 171822 | 52935    | 0.659422  | 0.865802 |
|      | PEPPER      | SNP    | 3327495 | 3303138 | 24357  | 9843   | 0.99268  | 0.99703   | 0.99485  |
| 30x  | R10.4.1     | INDEL  | 504501  | 407454  | 97047  | 58882  | 0.807638 | 0.877687  | 0.841207 |
|      | DeepVariant | SNP    | 3327495 | 3320004 | 7491   | 13466  | 0.997749 | 0.995962  | 0.996854 |
|      |             | R9.4.1 | INDEL   | 504501  | 348343 | 156158 | 51857    | 0.69047   | 0.873415 |
|      | PEPPER      | SNP    | 3327495 | 3310086 | 17409  | 8939   | 0.994768 | 0.997307  | 0.996036 |
| 35x  | R10.4.1     | INDEL  | 504501  | 416788  | 87713  | 55671  | 0.826139 | 0.885965  | 0.855007 |
|      | DeepVariant | SNP    | 3327495 | 3320458 | 7037   | 12739  | 0.997885 | 0.99618   | 0.997032 |
|      |             | R9.4.1 | INDEL   | 504501  | 360393 | 144108 | 50461    | 0.714355  | 0.880074 |
|      | PEPPER      | SNP    | 3327495 | 3313305 | 14190  | 8230   | 0.995736 | 0.997523  | 0.996628 |

Supplementary Table 5: Oxford Nanopore Technologies variant calling performance comparison between R9.4.1 and R10.4 chemistry data at coverages between 10x and 35x.

| Coverage | Platform               | Type  | Total   | TP      | FN     | FP    | Recall   | Precision | F1_Score |
|----------|------------------------|-------|---------|---------|--------|-------|----------|-----------|----------|
| 40x      | R10.4.1<br>DeepVariant | INDEL | 504501  | 423764  | 80737  | 52909 | 0.839967 | 0.892638  | 0.865502 |
|          |                        | SNP   | 3327495 | 3320622 | 6873   | 12133 | 0.997934 | 0.996361  | 0.997147 |
|          | R9.4.1<br>PEPPER       | INDEL | 504501  | 370622  | 133879 | 49181 | 0.734631 | 0.885651  | 0.803103 |
|          |                        | SNP   | 3327495 | 3315180 | 12315  | 7993  | 0.996299 | 0.997595  | 0.996947 |
| 45x      | R10.4.1<br>DeepVariant | INDEL | 504501  | 429614  | 74887  | 50066 | 0.851562 | 0.899097  | 0.874684 |
|          |                        | SNP   | 3327495 | 3320801 | 6694   | 10871 | 0.997988 | 0.996738  | 0.997363 |
|          | R9.4.1<br>PEPPER       | INDEL | 504501  | 378872  | 125629 | 47879 | 0.750984 | 0.890526  | 0.814824 |
|          |                        | SNP   | 3327495 | 3316265 | 11230  | 7717  | 0.996625 | 0.997679  | 0.997152 |
| 50x      | R10.4.1<br>DeepVariant | INDEL | 504501  | 434092  | 70409  | 47794 | 0.860438 | 0.904207  | 0.88178  |
|          |                        | SNP   | 3327495 | 3320812 | 6683   | 10474 | 0.997992 | 0.996857  | 0.997424 |
|          | R9.4.1<br>PEPPER       | INDEL | 504501  | 385925  | 118576 | 46668 | 0.764964 | 0.894782  | 0.824796 |
|          |                        | SNP   | 3327495 | 3316884 | 10611  | 7169  | 0.996811 | 0.997844  | 0.997327 |
| 55x      | R10.4.1<br>DeepVariant | INDEL | 504501  | 438117  | 66384  | 45778 | 0.868417 | 0.908663  | 0.888084 |
|          |                        | SNP   | 3327495 | 3320863 | 6632   | 9938  | 0.998007 | 0.997017  | 0.997512 |
|          | R9.4.1<br>PEPPER       | INDEL | 504501  | 392084  | 112417 | 45404 | 0.777172 | 0.898791  | 0.833569 |
|          |                        | SNP   | 3327495 | 3317426 | 10069  | 7255  | 0.996974 | 0.997818  | 0.997396 |
| 60x      | R10.4.1<br>DeepVariant | INDEL | 504501  | 441442  | 63059  | 43947 | 0.875007 | 0.912632  | 0.893423 |
|          |                        | SNP   | 3327495 | 3320861 | 6634   | 9573  | 0.998006 | 0.997127  | 0.997566 |
|          | R9.4.1<br>PEPPER       | INDEL | 504501  | 397171  | 107330 | 44010 | 0.787255 | 0.902738  | 0.841051 |
|          |                        | SNP   | 3327495 | 3317700 | 9795   | 7126  | 0.997056 | 0.997857  | 0.997457 |
| 65x      | R10.4.1<br>DeepVariant | INDEL | 504501  | 444208  | 60293  | 42612 | 0.88049  | 0.915553  | 0.897679 |
|          |                        | SNP   | 3327495 | 3320812 | 6683   | 9294  | 0.997992 | 0.99721   | 0.997601 |
|          | R9.4.1<br>PEPPER       | INDEL | 504501  | 401236  | 103265 | 42583 | 0.795313 | 0.906457  | 0.847255 |
|          |                        | SNP   | 3327495 | 3317934 | 9561   | 7111  | 0.997127 | 0.997862  | 0.997494 |

Supplementary Table 6: Oxford Nanopore Technologies variant calling performance comparison between R9.4.1 and R10.4 chemistry data at coverages between 40x and 65x.

| Cov | Type            | Type  | Total | TP    | FN   | FP   | Recall   | Precision | F1       |
|-----|-----------------|-------|-------|-------|------|------|----------|-----------|----------|
| 10x | R10.4.1 Duplex  | INDEL | 11256 | 7610  | 3646 | 1649 | 0.676084 | 0.825207  | 0.743239 |
|     |                 | SNP   | 71333 | 67511 | 3822 | 905  | 0.94642  | 0.986779  | 0.966178 |
|     | R10.4.1 Simplex | INDEL | 11256 | 6751  | 4505 | 1614 | 0.599769 | 0.810073  | 0.689236 |
|     |                 | SNP   | 71333 | 66281 | 5052 | 1336 | 0.929177 | 0.980252  | 0.954031 |
| 15x | R10.4.1 Duplex  | INDEL | 11256 | 8624  | 2632 | 1529 | 0.766169 | 0.853051  | 0.807279 |
|     |                 | SNP   | 71333 | 70666 | 667  | 200  | 0.990649 | 0.997179  | 0.993904 |
|     | R10.4.1 Simplex | INDEL | 11256 | 7842  | 3414 | 1572 | 0.696695 | 0.836454  | 0.760205 |
|     |                 | SNP   | 71333 | 70054 | 1279 | 533  | 0.98207  | 0.992453  | 0.987234 |
| 20x | R10.4.1 Duplex  | INDEL | 11256 | 9092  | 2164 | 1383 | 0.807747 | 0.871397  | 0.838365 |
|     |                 | SNP   | 71333 | 71184 | 149  | 113  | 0.997911 | 0.998416  | 0.998164 |
|     | R10.4.1 Simplex | INDEL | 11256 | 8353  | 2903 | 1498 | 0.742093 | 0.851566  | 0.793069 |
|     |                 | SNP   | 71333 | 70967 | 366  | 223  | 0.994869 | 0.996869  | 0.995868 |
| 25x | R10.4.1 Duplex  | INDEL | 11256 | 9359  | 1897 | 1312 | 0.831468 | 0.880488  | 0.855276 |
|     |                 | SNP   | 71333 | 71250 | 83   | 93   | 0.998836 | 0.998697  | 0.998767 |
|     | R10.4.1 Simplex | INDEL | 11256 | 8690  | 2566 | 1425 | 0.772033 | 0.862849  | 0.814918 |
|     |                 | SNP   | 71333 | 71169 | 164  | 162  | 0.997701 | 0.99773   | 0.997716 |
| 30x | R10.4.1 Duplex  | INDEL | 11256 | 9528  | 1728 | 1282 | 0.846482 | 0.884868  | 0.865249 |
|     |                 | SNP   | 71333 | 71269 | 64   | 79   | 0.999103 | 0.998893  | 0.998998 |
|     | R10.4.1 Simplex | INDEL | 11256 | 8974  | 2282 | 1369 | 0.797264 | 0.871335  | 0.832655 |
|     |                 | SNP   | 71333 | 71211 | 122  | 141  | 0.99829  | 0.998025  | 0.998157 |
| 35x | R10.4.1 Duplex  | INDEL | 11256 | 9700  | 1556 | 1162 | 0.861763 | 0.896453  | 0.878766 |
|     |                 | SNP   | 71333 | 71276 | 57   | 78   | 0.999201 | 0.998907  | 0.999054 |
|     | R10.4.1 Simplex | INDEL | 11256 | 9145  | 2111 | 1338 | 0.812456 | 0.876088  | 0.843073 |
|     |                 | SNP   | 71333 | 71236 | 97   | 123  | 0.99864  | 0.998277  | 0.998459 |
| 40x | R10.4.1 Duplex  | INDEL | 11256 | 9830  | 1426 | 1068 | 0.873312 | 0.905109  | 0.888926 |
|     |                 | SNP   | 71333 | 71279 | 54   | 73   | 0.999243 | 0.998978  | 0.99911  |
|     | R10.4.1 Simplex | INDEL | 11256 | 9318  | 1938 | 1204 | 0.827825 | 0.888961  | 0.857304 |
|     |                 | SNP   | 71333 | 71233 | 100  | 123  | 0.998598 | 0.998277  | 0.998438 |
| 45x | R10.4.1 Duplex  | INDEL | 11256 | 9920  | 1336 | 1011 | 0.881308 | 0.910523  | 0.895677 |
|     |                 | SNP   | 71333 | 71283 | 50   | 69   | 0.999299 | 0.999033  | 0.999166 |
|     | R10.4.1 Simplex | INDEL | 11256 | 9443  | 1813 | 1171 | 0.83893  | 0.892834  | 0.865043 |
|     |                 | SNP   | 71333 | 71239 | 94   | 127  | 0.998682 | 0.998222  | 0.998452 |
| 50x | R10.4.1 Duplex  | INDEL | 11256 | 10024 | 1232 | 951  | 0.890547 | 0.916248  | 0.903215 |
|     |                 | SNP   | 71333 | 71286 | 47   | 69   | 0.999341 | 0.999034  | 0.999187 |
|     | R10.4.1 Simplex | INDEL | 11256 | 9530  | 1726 | 1108 | 0.84666  | 0.898914  | 0.872005 |
|     |                 | SNP   | 71333 | 71249 | 84   | 120  | 0.998822 | 0.99832   | 0.998571 |

Supplementary Table 7: Oxford Nanopore Technologies variant calling performance comparison between Simplex and Duplex data types.
